# Supplementary material for: Phase I trials using Sleeping Beauty to generate CD19-specific CAR T cells
Source: JCI journal article supplement (doi:10.1172/jci86721), 2016-08-01
Supplement: sd2 [file 2]

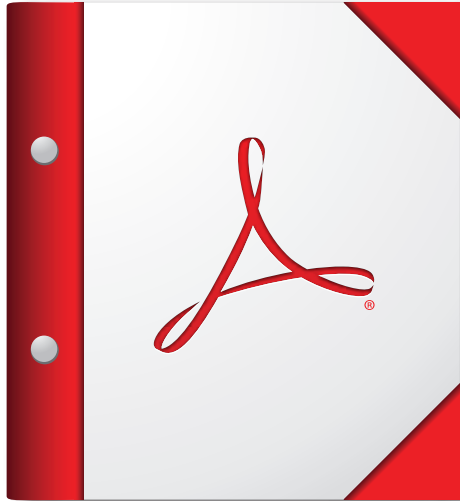

**For the best experience, open this PDF portfolio in  
Acrobat X or Adobe Reader X, or later.**

[Get Adobe Reader Now!](#)
